# Supplementary material
Source: Springer Nature journal article supplement (https://www.springermedizin.de/resource/supplementary/12935_2010_255_MOESM6_ESM.pdf/9540156)

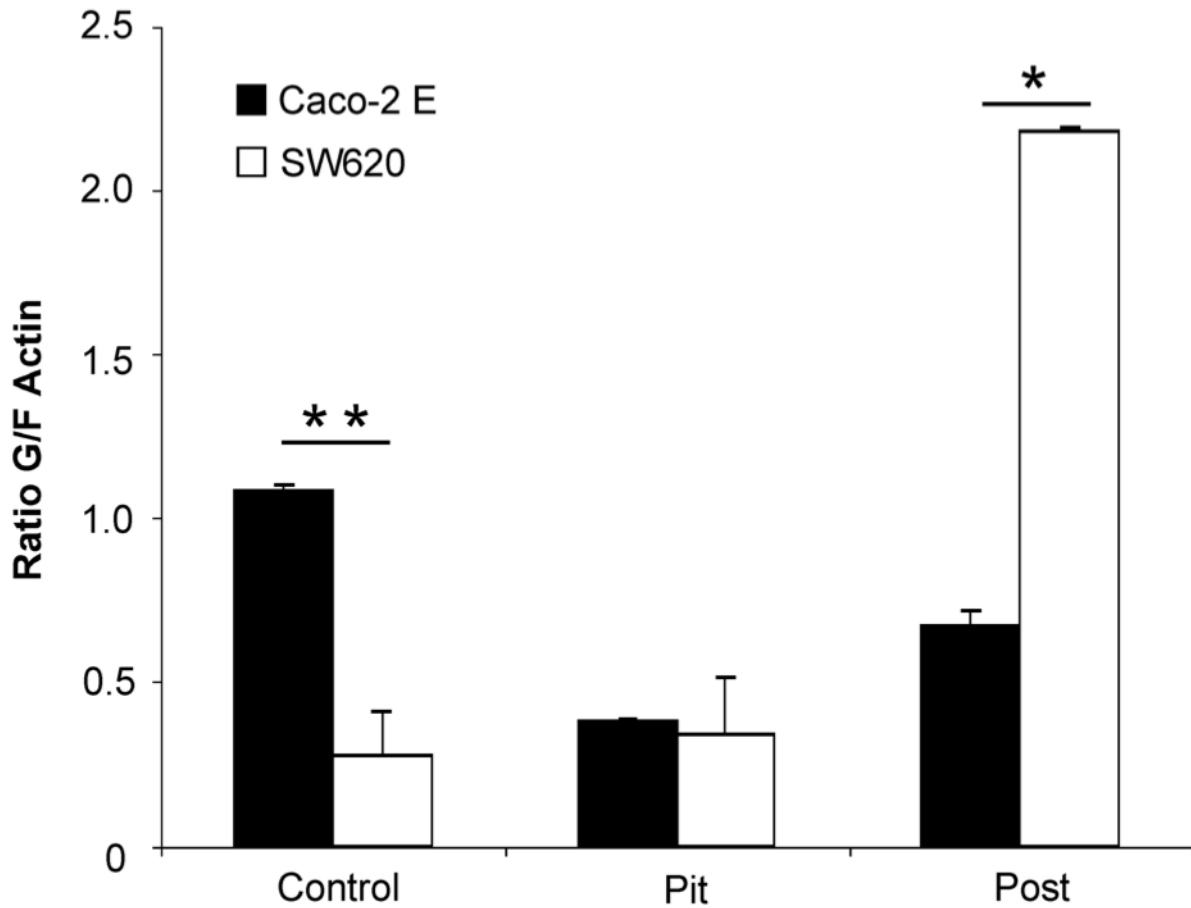

Supplement: MOESM6 [file 9540156]
